# Supplementary material
Source: publisher figshare collection journal article supplement (https://asha.figshare.com/articles/dataset/_/23605311)
Supplement: Supplementary file 1 [file 1]

**Supplemental Material S5.** Study appraisal tool.

| Appraisal categories         | High                                                                                                                                                                                                                                    | Moderate                                                                                                                                                               | Low                                      |
|------------------------------|-----------------------------------------------------------------------------------------------------------------------------------------------------------------------------------------------------------------------------------------|------------------------------------------------------------------------------------------------------------------------------------------------------------------------|------------------------------------------|
| <b>Design</b>                | case-series experimental design (experimental = control behaviour); large group (> 10) with appropriate control group                                                                                                                   | single-subject experimental design (experimental = control behaviour); large group without or inappropriate control; small group (< 10) with appropriate control group | if study fails to attain moderate rating |
| <b>Demographic variables</b> | must report at least THREE of the following: age; gender; education; marital status; language; socioeconomic status; ethnicity; co-morbid condition(s)                                                                                  | Must report age and education, plus TWO other demographic variables                                                                                                    | if study fails to attain moderate rating |
| <b>Stroke variables</b>      | must report FOUR of the following: stroke type (e.g., infarct); hemisphere affected/location; severity; time post-onset; stroke-related co-morbid conditions (e.g., hemiplegia, epilepsy); risk factors (e.g., smoking, blood pressure) | reports THREE stroke variables                                                                                                                                         | if study fails to attain moderate rating |
| <b>Cognitive variables</b>   | must report ALL THREE of the following: memory skills (e.g., STM/WM); attention or executive skills; language skills                                                                                                                    | reports TWO cognitive variables                                                                                                                                        | if study fails to attain moderate rating |

Overall rating: For High rating, study must score High in 3/4 categories (with no Low rating)

For Moderate rating, it cannot include any Low rating
