# Supplementary material
Source: publisher figshare collection journal article supplement (https://asha.figshare.com/articles/dataset/_/23605311)
Supplement: Supplementary file 5 [file 1]

**Supplemental Material S4.** Details of database searches.

**Embase & PsycINFO**

- 1 (aphasia or dysphasia or stroke or cva or cerebrovascular accident or cerebrovascular-accident or TIA or transient ischemic attack or transient ischaemic attack or mini stroke or mini-stroke or mild stroke or minor stroke).ab.
- 2 limit 1 to english language
- 3 limit 2 to human
- 4 (dual task\* or dual-task\* or multitask\* or multi-task\* or selective attention or divided attention or cognitive control or distract\* or interference or concurrent task).ab.
- 5 limit 4 to "300 adulthood <age 18 yrs and older>"
- 6 limit 5 to adulthood <18+ years>
- 7 limit 6 to english language
- 8 limit 7 to human
- 9 limit 8 to english
- 10 (speak\* or speech or language or linguistic or discourse or conversation or communication or word\* or sentence\* or naming or spoken).ab.
- 11 limit 10 to "300 adulthood <age 18 yrs and older>"
- 12 limit 11 to adulthood <18+ years>
- 13 limit 12 to english language
- 14 limit 13 to human
- 15 limit 14 to english
- 16 3 and 9 and 14

### Web of Science & MEDLINE

#1 AB=(aphasia OR dysphasia OR stroke OR cva OR cerebrovascular accident OR cerebrovascular-accident OR TIA OR transient ischemic attack OR transient ischaemic attack OR mini stroke OR mini-stroke OR mild stroke OR minor stroke)

#2 AB=(dual task\* OR dual-task\* OR multitask\* OR multi-task\* OR selective attention OR divided attention OR cognitive control OR distract\* OR interference OR concurrent task)

#3 AB=(speak\* OR speech OR language OR linguistic OR discourse OR conversation OR communication OR word\* OR sentence\* OR naming OR spoken)

#1 AND #2 AND #3 (Excluded Research Areas) Legal Medicine or Mycology or Nutrition Dietetics or Emergency Medicine or Chemistry or Developmental Biology or Energy Fuels or Environmental Sciences Ecology or Evolutionary Biology or Family Studies or Food Science Technology or Gastroenterology Hepatology or Instruments Instrumentation or Obstetrics Gynecology or Optics or Parasitology or Philosophy or Physical Sciences Other Topics or Physics or Public Administration or Respiratory System or Toxicology or Urology Nephrology or Zoology or Virology or Pediatrics or Mathematical Computational Biology or Physiology or Surgery or Oncology or Hematology or Integrative Complementary Medicine or Infectious Diseases or Geology or Agriculture or Anthropology or Arts Humanities Other Topics or Automation Control Systems or Art or Microscopy or Cell Biology or Anatomy Morphology or Telecommunications or Biophysics or Business Economics or Information Science Library Science or Genetics Heredity or Mathematics or Ophthalmology or Immunology or Spectroscopy or Transplantation or Endocrinology Metabolism or Pharmacology Pharmacy or Biochemistry Molecular Biology or Microbiology or Reproductive Biology

### Linguistics and Language Behavior Abstracts (LLBA)

(((((((((ab(aphasia) OR ab(dysphasia) OR ab(stroke) OR ab(cerebrovascular accident) OR ab(cerebrovascular-accident) OR ab(TIA) OR ab(mini stroke) OR ab(transient ischaemic attack) OR ab(transient ischemic attack) OR ab(mini-stroke)) AND stype.exact("Scholarly Journals")) AND at.exact("Review" OR "Article")) AND la.exact("English") AND pd(20210101-20220228)) AND peer(yes)) AND stype.exact("Scholarly Journals")) AND at.exact("Review" OR "Article")) AND la.exact("English")) AND PEER(yes)) OR ((((((((((ab(CVA) OR ab(mild stroke) OR ab(minor stroke)) AND stype.exact("Scholarly Journals")) AND at.exact("Review" OR "Article")) AND la.exact("English") AND pd(20210101-20220228)) AND peer(yes)) AND stype.exact("Scholarly Journals")) AND at.exact("Review" OR "Article")) AND la.exact("English")) AND PEER(yes))) AND ((((((((((ab(dual task) OR ab(dual-task\*) OR ab(multitask\*) OR ab(multi-task\*) OR ab(selective attention) OR ab(divided attention) OR ab(cognitive control) OR ab(distract) OR ab(interference) OR ab(concurrent task)) AND

stype.exact("Scholarly Journals")) AND at.exact("Review" OR "Article")) AND la.exact("English") AND pd(20210101-20220228)) AND peer(yes)) AND  
stype.exact("Scholarly Journals")) AND at.exact("Review" OR "Article")) AND la.exact("English")) AND PEER(yes)) AND (((((((((ab(speak\*) OR ab(speech) OR  
ab(language) OR ab(linguistic) OR ab(discourse) OR ab(conversation) OR ab(communication) OR ab(word\*) OR ab(naming) OR ab(spoken)) AND  
stype.exact("Scholarly Journals")) AND at.exact("Review" OR "Article")) AND la.exact("English") AND pd(20210101-20220228)) AND peer(yes)) AND  
stype.exact("Scholarly Journals")) AND at.exact("Review" OR "Article")) AND la.exact("English")) AND PEER(yes)) OR (((((((((ab(sentence\*) OR ab(sentence\*))  
AND stype.exact("Scholarly Journals")) AND at.exact("Review" OR "Article")) AND la.exact("English") AND pd(20210101-20220228)) AND peer(yes)) AND  
stype.exact("Scholarly Journals")) AND at.exact("Review" OR "Article")) AND la.exact("English")) AND  
PEER(yes)))
